# Supplementary material for: Deconstructing and repurposing the light-regulated interplay between Arabidopsis phytochromes and interacting factors
Source: PubMed Central journal article supplement (PMC6888877; doi:10.1038/s42003-019-0687-9), 2019-12-02
Supplement: 42003_2019_687_MOESM1_ESM.pdf [file 42003_2019_687_MOESM1_ESM.pdf]

---

## Supplementary Information - Golonka *et al.*

### Supplementary Figures

#### Supplementary Figure 1

```
PIF1      1 MHHFVPDFDTHDDYVNNHNSLNLHLPKRSITTMGE DDDLMELLWQNGQVVQNORLHTKKPSSSPKLL 69
PIF2/PIL1 1 -----MEAKPLASSSEPNMISPSSNIKPKLK- DEDYMELVCENGQILAKIRRPKNGSFQKQ-RRQ 61
PIF3      1 -----MPLFELFRLTKAKLESAQDRNPSPPVDEVVELVWENGQISTQSQSSRSRNIPPPQANSS 59
PIF4      1 -----MEHQGWSFEENYSLSTNRRSIRPQDELVELLWRDGQVVLQSQTHREQTQKQDHHE 57
PIF5      1 -----MEQVFADWNFEDNFHMSTNKRSIRPEDELVELLWRDGQVVLQSQARREPS-VQVQTHKQ 59
PIF6      1 -----MMFLPTDYCCRLS-DQEYMELVFENGQILAKGQR--SNVSLHNQ-RTK 45
PIF7      1 -----MSNYGVKELTWENGQLTVHGLGDEVEPTTSNNPIWT 36
PIF8      1 MSQCVPNCHIDTPAAATTTVRSTTAADIPII---DYEVAELTWENGQGLHGLGPPRVTASSTKYSTG 66
```

```
PIF1      70 -----PSMDPQQQPSSDQNLFIQEDEMTSWLHYPLR----- 100
PIF2/PIL1 62 SLLDLYETEYSEGFKNI-----KILGDTQVVPVSQSKPQQDKET----- 100
PIF3      60 RAREIGNGSKTTMVDEIPMSVPSIMTGLSQDDDFVPWLNHH----- 100
PIF4      58 EALR--SSTFLEDQETVSWIQYPPEDDPFEPDDFSSHHFFSTMDPL----- 100
PIF5      60 ETLRKPNNIFLDNQETVQKPNYAALDDQ---ETVSWIQYPPDDVI----- 100
PIF6      46 SIMDLYEAEYNEDFMKSIIHHGGGAITNLGDTQVVPQSHVAAAHETNMLESNKHVD----- 100
PIF7      37 QSL-----NGCETLESVVHQAAALQQPSKFQLQSPNGPNHNYESKDGSCSRKRGYPQEMDRWFAVQEESH 100
PIF8      67 AGGTLESIVDQATRLPNPKPT-----DELVPWFHHSSR----- 100
```

Sequence alignment of the N-terminal segments of the *A. thaliana* PIFs 1-8 according to Khanna *et al.*<sup>1</sup> Red color marks the N-terminal methionine; violet and gray color indicate strictly conserved and moderately conserved residues, respectively. Boxes highlight the conserved APB.A (red) and APB.B (blue) segments.

Supplementary Figure 2

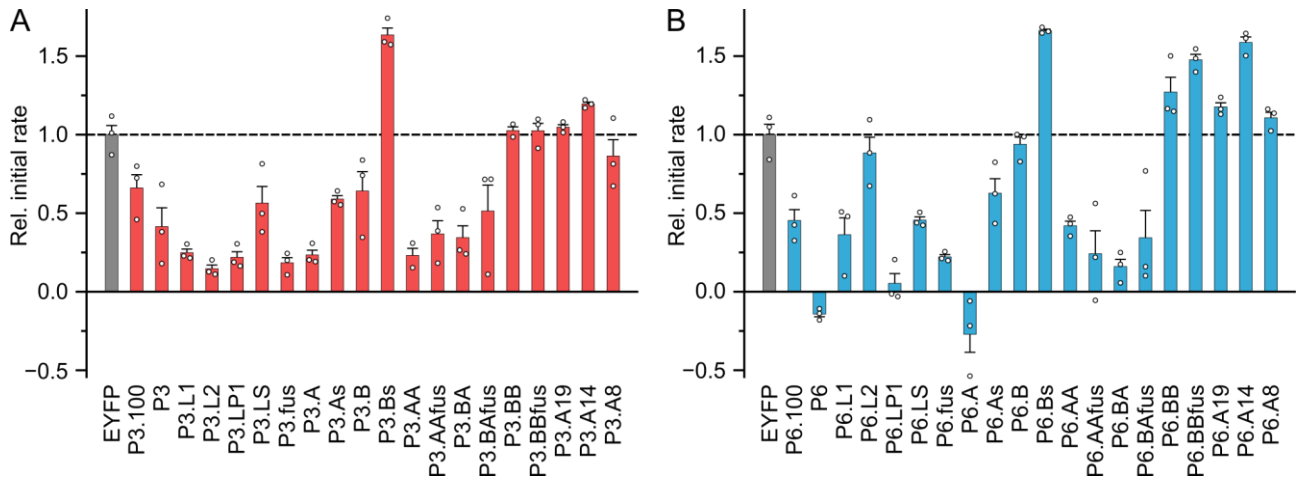

The initial rates of the recovery reaction of the *AtPhyB* PCM following red-light exposure were determined in bacterial lysate in the presence of different *AtPIF* variants and normalized to the reading obtained for the EYFP negative control. Data indicate mean  $\pm$  SEM of  $n = 3$  independent biological replicates. See Fig. 2 for details.

Supplementary Figure 3

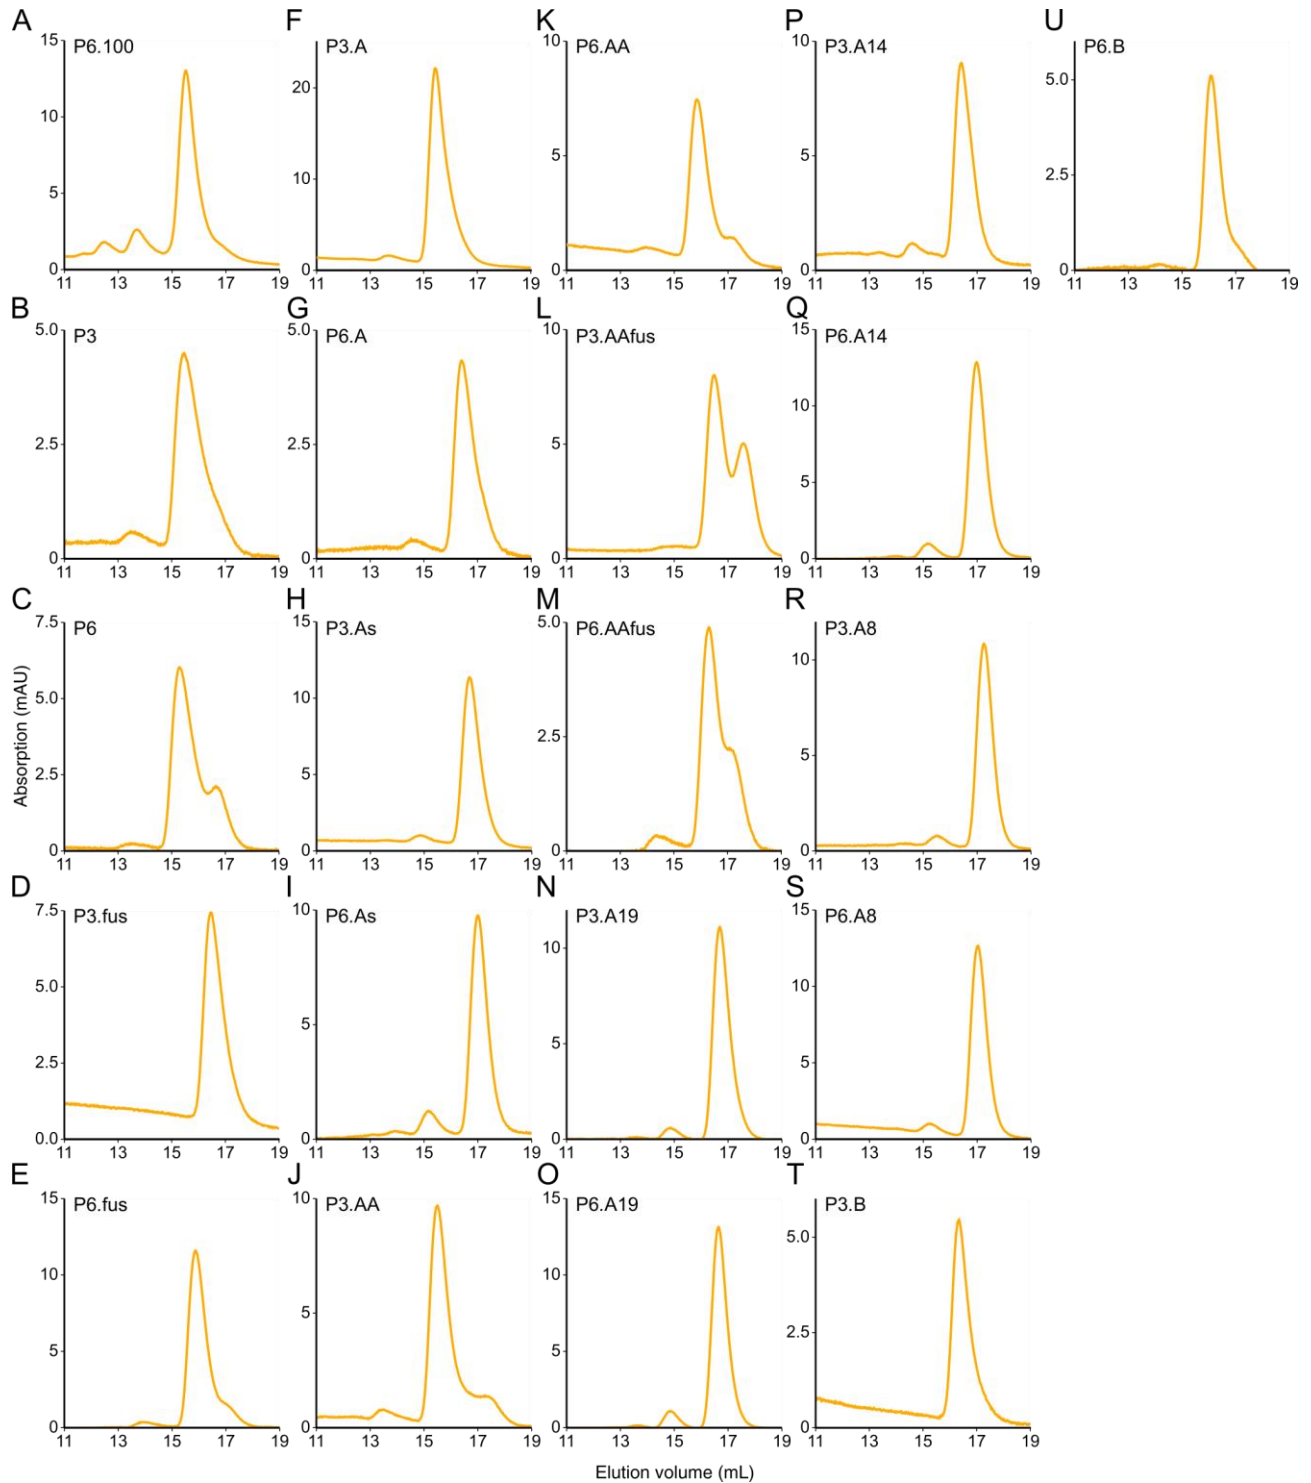

Oligomeric state of the *AtPIF* variants. (A) 10  $\mu$ M P6.100-EYFP were analyzed by size-exclusion chromatography, where the yellow lines represent the absorption at 513 nm. (B-U) As in (A), but for (B) P3; (C) P6; (D) P3.fus; (E) P6.fus; (F) P3.A; (G) P6.A; (H) P3.As; (I) P6.As; (J) P3.AA; (K) P6.AA; (L) P3.AAfus; (M) P6.AAfus; (N) P3.A19; (O) P6.A19; (P) P3.A14; (Q) P6.A14; (R) P3.A8; (S) P6.A8; (T) P3.B; (U) P6.B.

Supplementary Figure 4

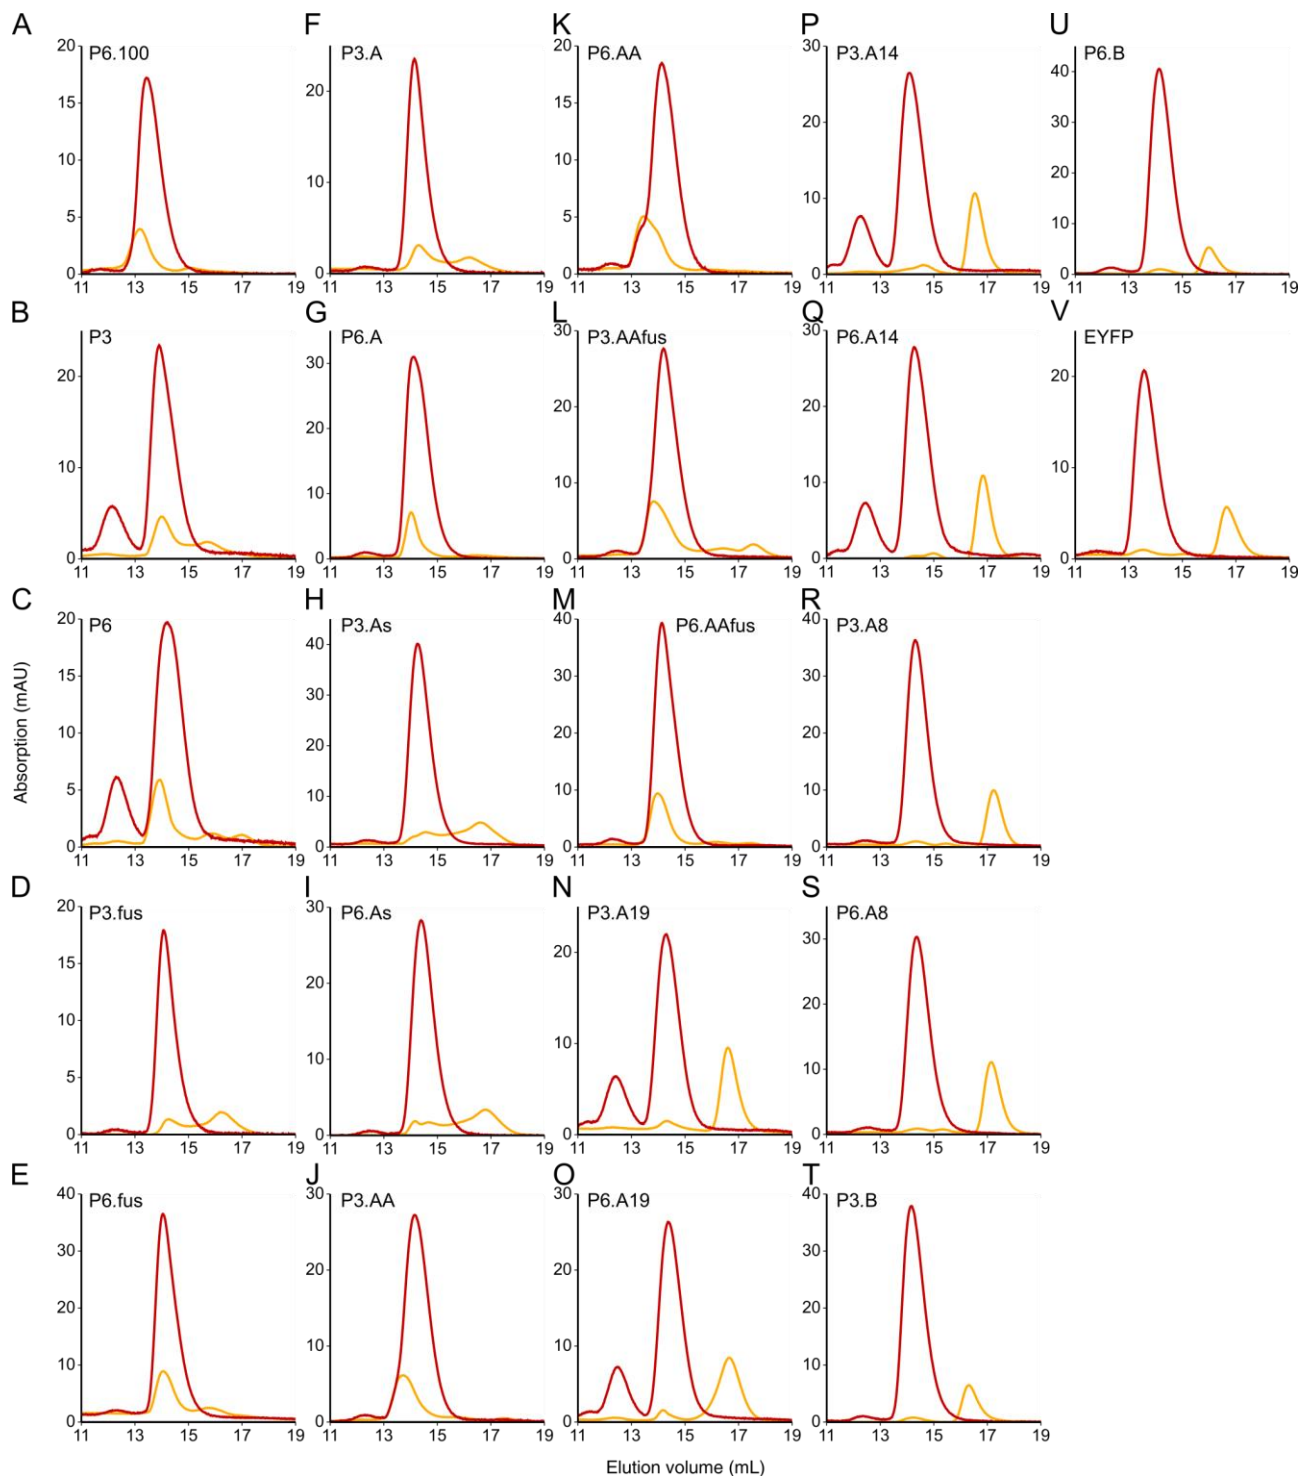

Light-dependent interactions of the *AtPIF* variants with the Pfr state of the *AtPhyB* PCM. (A) A mixture of 10  $\mu$ M P6.100-EYFP and 50  $\mu$ M *AtPhyB* PCM was exposed to red light and analyzed by size-exclusion chromatography, where the yellow and red lines represent the absorption at 513 and 650 nm, respectively. (B-V) As in (A), but instead of P6.100-EYFP for (B) P3; (C) P6; (D) P3.fus; (E); P6.fus; (F) P3.A; (G) P6.A; (H) P3.As; (I) P6.As; (J) P3.AA; (K) P6.AA; (L) P3.AAfus; (M) P6.AAfus; (N) P3.A19; (O) P6.A19; (P) P3.A14; (Q) P6.A14; (R) P3.A8; (S) P6.A8; (T) P3.B; (U) P6.B; (V) EYFP. The schematics in the graphs indicate the composition of the *AtPIF* variants, with variants deriving from *AtPIF3* and *AtPIF6* shown in red and blue, respectively.

Supplementary Figure 5

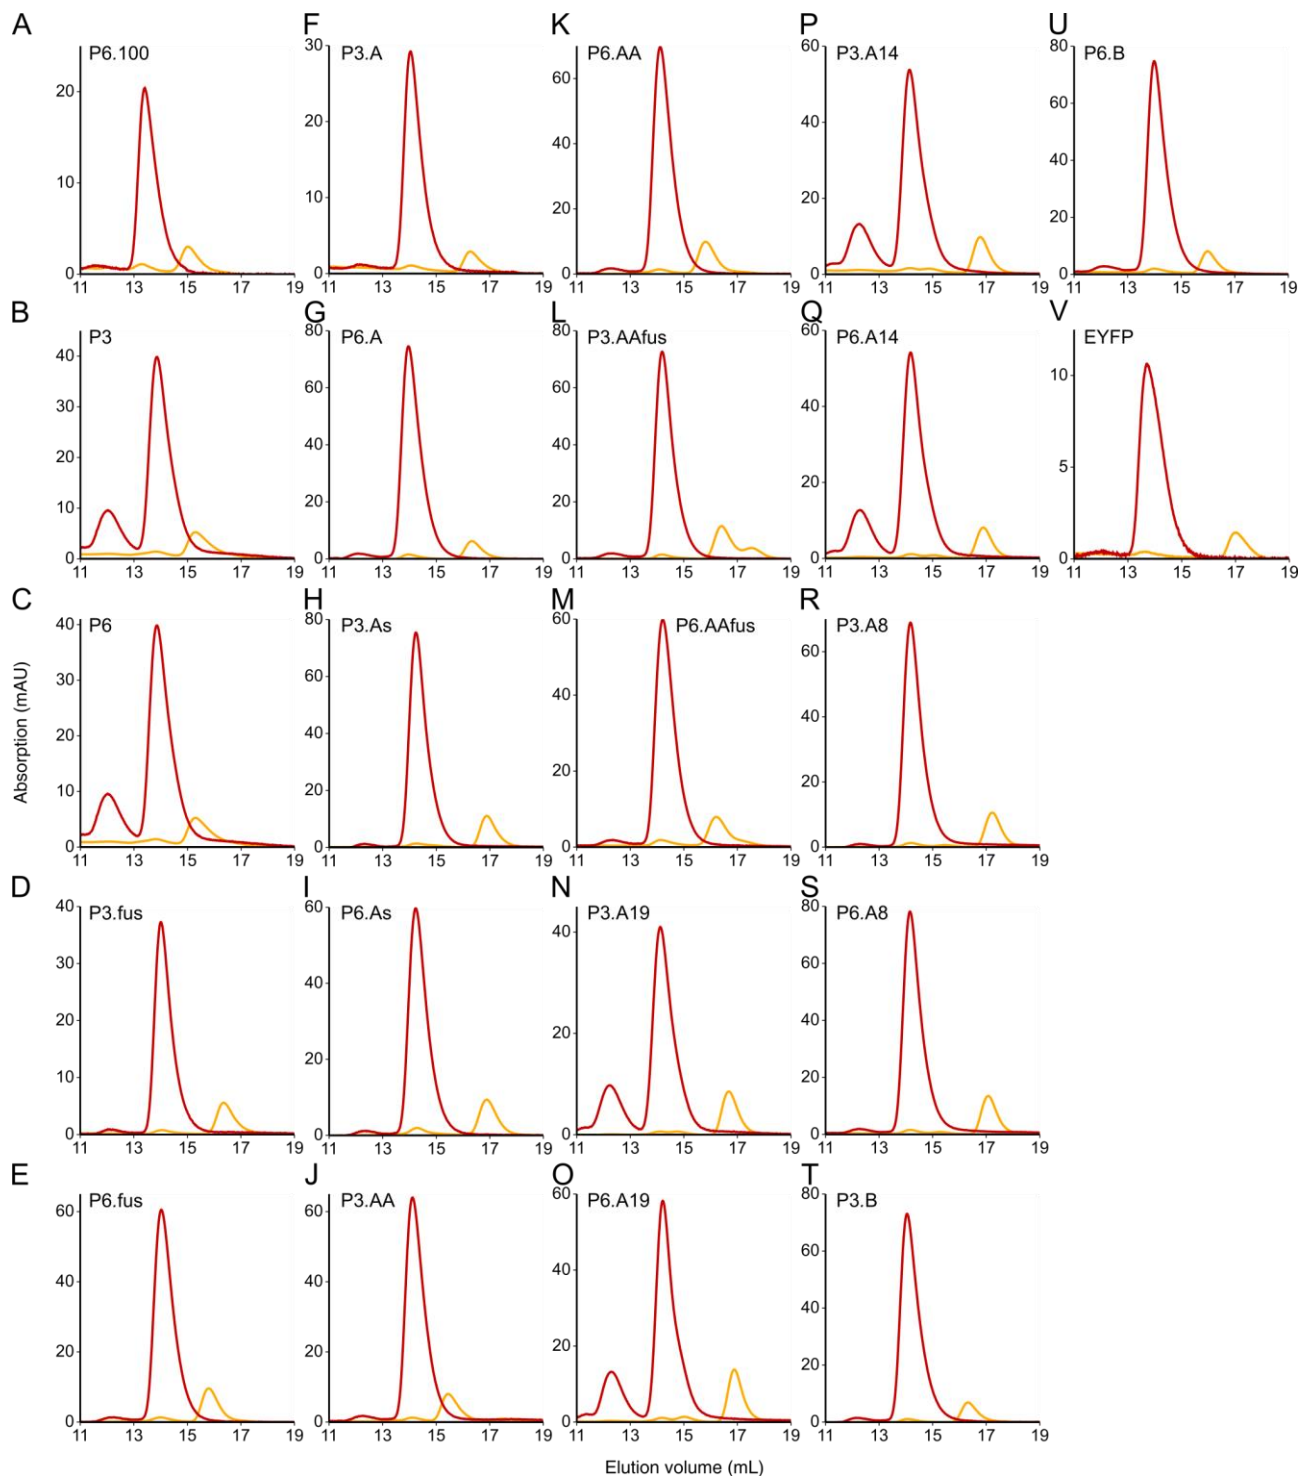

Light-dependent interactions of the *AtPIF* variants with the Pr state of the *AtPhyB* PCM. (A) A mixture of 10  $\mu\text{M}$  P6.100-EYFP and 50  $\mu\text{M}$  *AtPhyB* PCM was exposed to far-red light and analyzed by size-exclusion chromatography, where the yellow and red lines represent the absorption at 513 and 650 nm, respectively. (B-V) As in (A), but instead of P6.100-EYFP for (B) P3; (C) P6; (D) P3.fus; (E) P6.fus; (F) P3.A; (G) P6.A; (H) P3.As; (I) P6.As; (J) P3.AA; (K) P6.AA; (L) P3.AAfus; (M) P6.AAfus; (N) P3.A19; (O) P6.A19; (P) P3.A14; (Q) P6.A14; (R) P3.A8; (S) P6.A8; (T) P3.B; (U) P6.B; (V) EYFP. The schematics in the graphs indicate the composition of the *AtPIF* variants, with variants deriving from *AtPIF3* and *AtPIF6* shown in red and blue, respectively.

Supplementary Figure 6

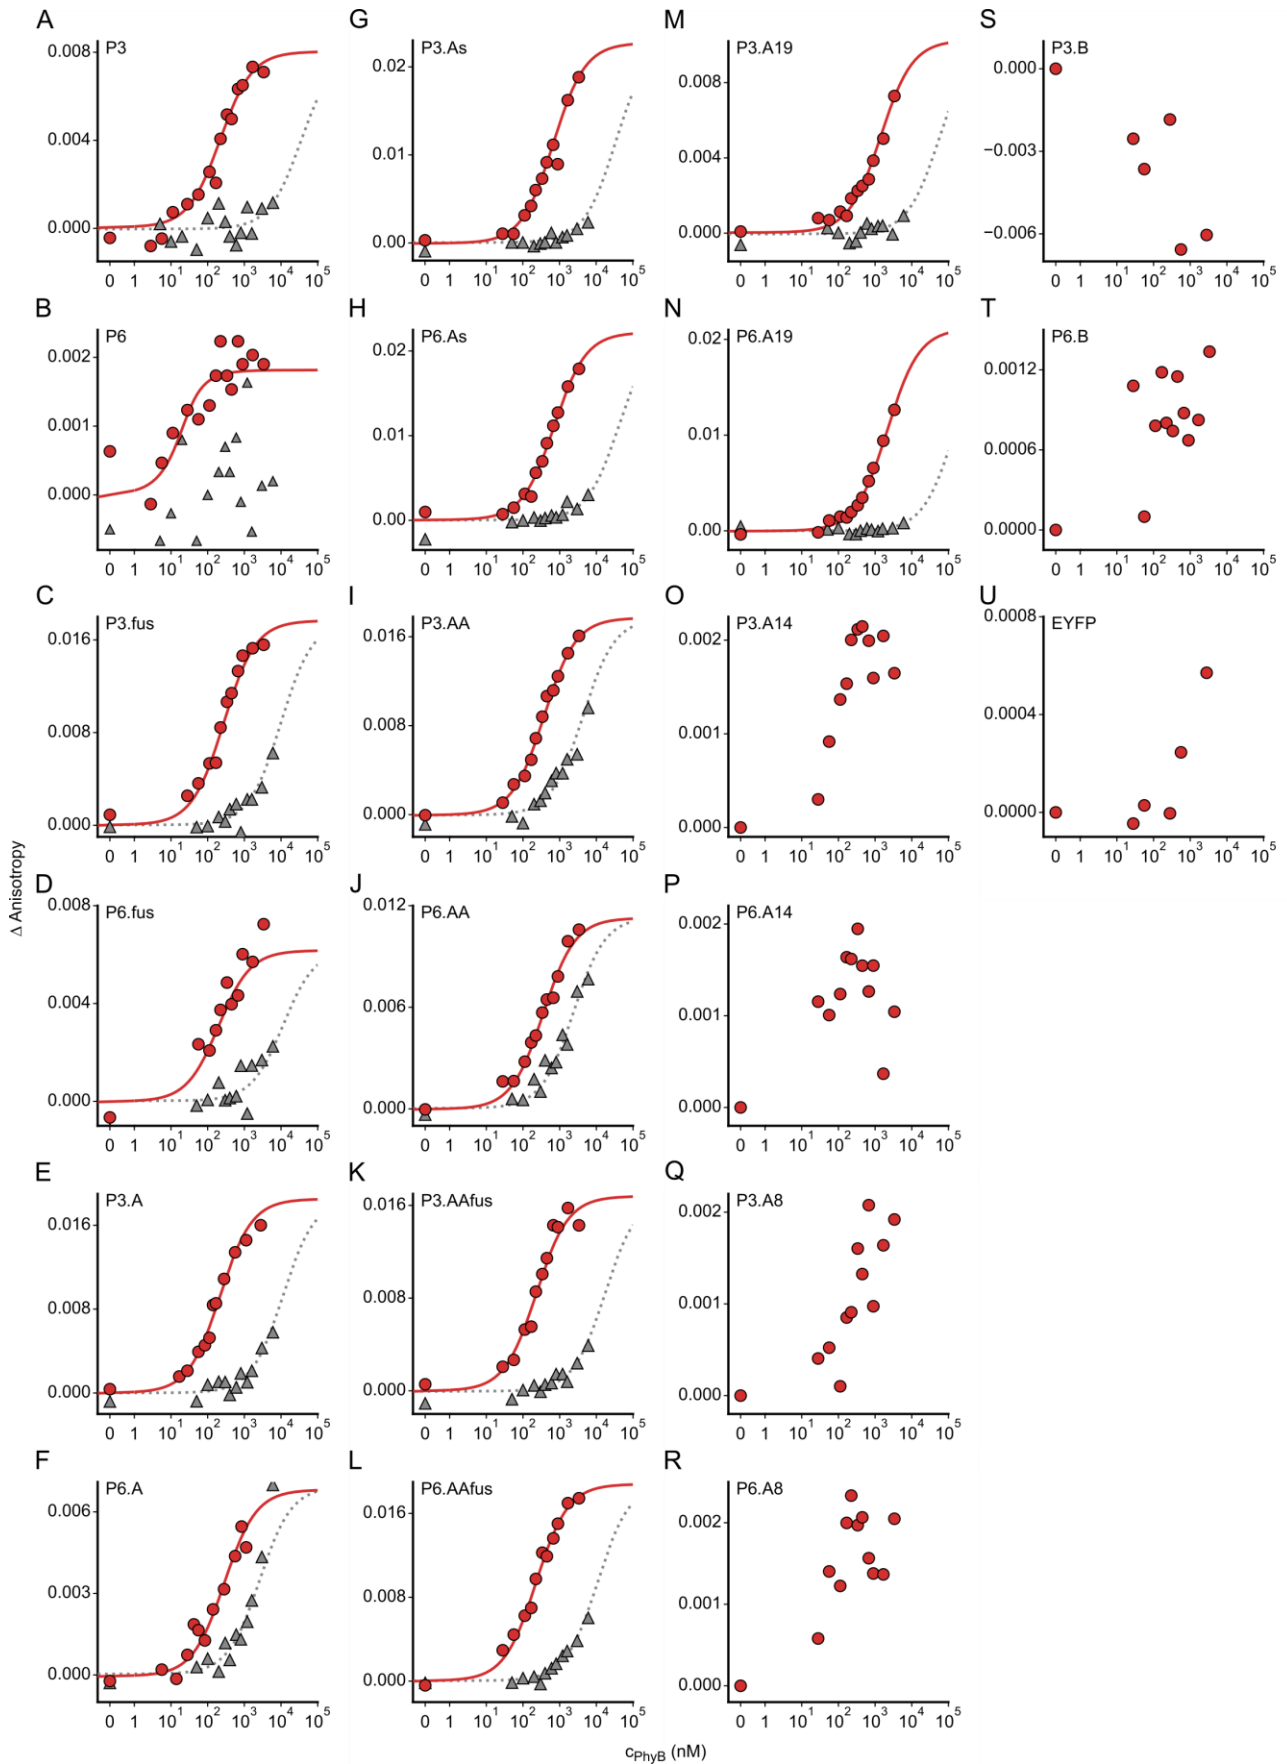

Quantitative analyses of the light-dependent protein:protein interaction between AtPIF variants and the AtPhyB PCM. (A) Titration of 20 nM P3-EYFP with increasing concentrations of dark-adapted

---

(gray) or red-light-exposed *AtPhyB* PCM (red), as monitored by anisotropy of the EYFP fluorescence. Data points show averages of three biological replicates. The lines denote fits to single-site binding isotherms. (B-U) As in (A), but instead of P3-EYFP for (B) P6; (C) P3.fus; (D) P6.fus; (E) P3.A; (F) P6.A; (G) P3.As; (H) P6.As; (I) P3.AA; (J) P6.AA; (K) P3.AAfus; (L) P6.AAfus; (M) P3.A19; (N) P6.A19; (O) P3.14; (P) P6.14; (Q) P3.8; (R) P6.8; (S) P3.B; (T) P6.B; (U) EYFP.

Supplementary Figure 7

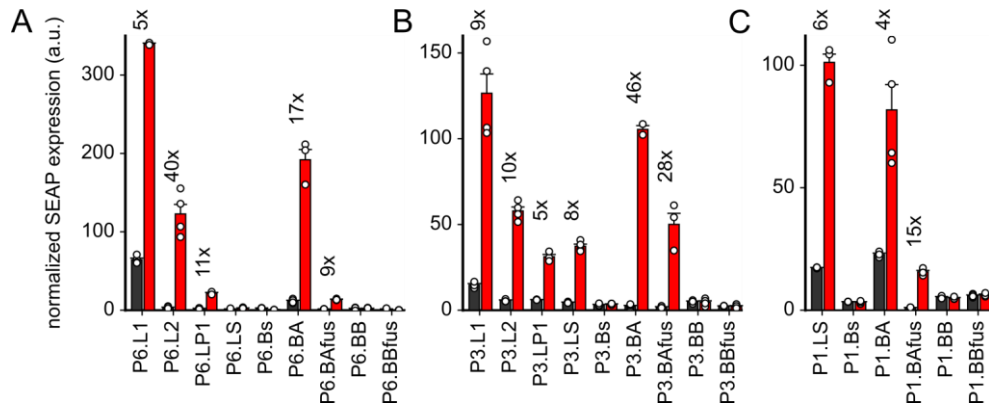

Harnessing the *AtPIF* variants for the light-dependent regulation of gene expression in mammalian cells. (A) SEAP expression was determined for the diverse *AtPIF6* variants and normalized to the constitutive expression of *Gaussia* luciferase. Black and red bars denote mean normalized SEAP expression  $\pm$  SEM for  $n = 4$  independent biological replicates under dark conditions or red light, respectively. The numbers above the bars indicate the factor difference between dark and red-light conditions for a given *AtPIF6* variant. (B) As panel (A) but for the *AtPIF3* variants. (C) As panel (A) but for the *AtPIF1* variants.



Supplementary Figure 8

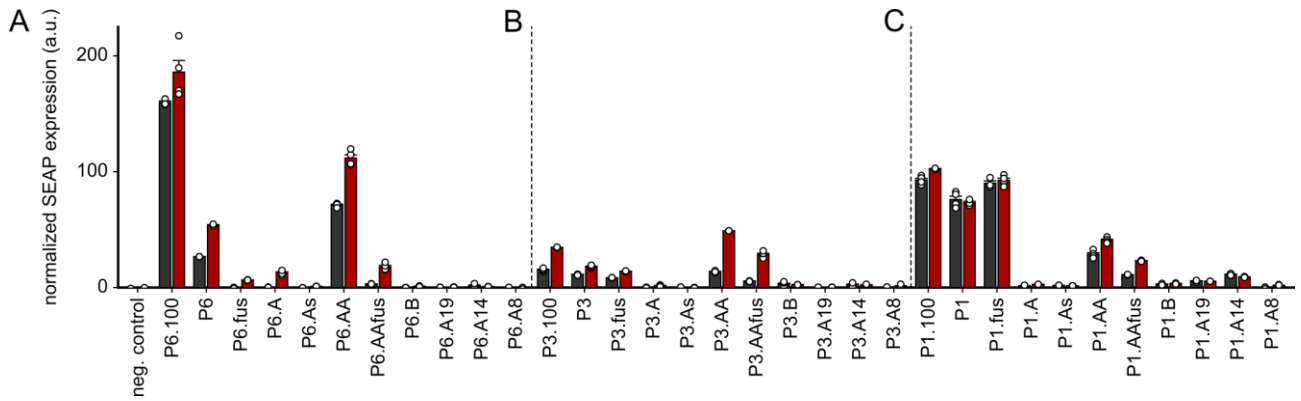

Light-dependent regulation of gene expression in mammalian cells. The experiment was conducted as described in Fig. 5 but the cells were incubated in darkness for 48 h (black bars) or for 24 h under  $20 \mu\text{mol m}^{-2} \text{s}^{-1}$  660-nm light, followed by  $20 \mu\text{mol m}^{-2} \text{s}^{-1}$  740-nm light for another 24 h (brown). (A) SEAP expression was determined for the diverse *AtPIF6* variants and normalized to the constitutive expression of *Gaussia* luciferase. Bars denote mean normalized SEAP expression  $\pm$  SEM for  $n = 4$  independent biological replicates. (B) As panel (A) but for the *AtPIF3* variants. (C) As panel (A) but for the *AtPIF1* variants.

Supplementary Figure 9

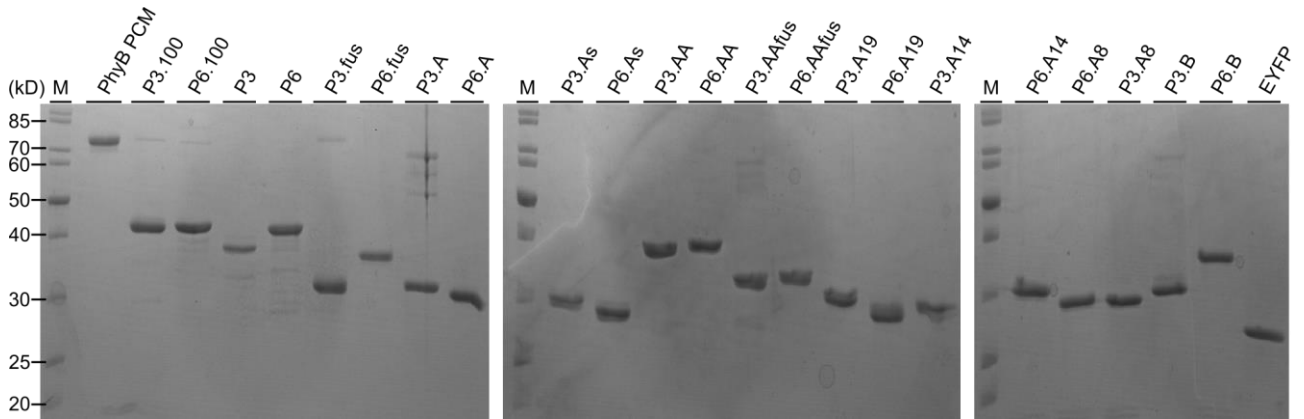

Analysis of the purified *AtPIF3/6-EYFP* proteins and the *AtPhyB* PCM by denaturing polyacrylamide gel electrophoresis.

## Supplementary Tables

Supplementary Table 1. Amino-acid sequences of the AtPIF variants used in this study.

| Name   | Sequence <sup>a</sup> |             |            |            |              |
|--------|-----------------------|-------------|------------|------------|--------------|
| P1.100 | MHHFVPDFDT            | DDDYVNNHNS  | SLNHLPRKSI | TTMGEDDDLM | ELLWQNGQVV   |
|        | VQNQRLHTTK            | PSSSPKLLP   | SMDPQQQPSS | DQNLFIQEDE | MTSWLHYPLR   |
| P3.100 | MPLFELFRLT            | KAKLESAQDR  | NPSPPVDEVV | ELVWENQQLS | TQSQSSRSRN   |
|        | I PPPQANSSR           | AREIGNGSKT  | TMVDEIPMSV | PSLMTGLSQD | DDFVFWLNHH   |
| P6.100 | MMFLPTDYCC            | RLSDQEYMEI  | VFENGQILAK | GORSNVSLHN | QRTKSIMDLY   |
|        | EAEYNEDFMK            | SI IHGGGGAI | TNLGDTQVVP | QSHVAAAHET | NMLESNKHVD   |
| P1     | MDDDLMEI LW           | QNGQVVVQNG  | RLHTKKPSSS | PPKLLPCMDP | QQQPSSDQNL   |
|        | FIQEDEMSTW            | LHYPLR      |            |            |              |
| P3     | MVDEVVEI VW           | ENGOISTQSQ  | SSRSRNIPPP | QANSSRAREI | GNGSKTTMVD   |
|        | EIPMSVPSLM            | TGLSQDDDFV  | PWLNHH     |            |              |
| P6     | MDQEYMEI VF           | ENGOILAKGQ  | RSNVSLHNQR | TKSIMDLYEA | EYNEDFMKSI   |
|        | I HGGGGAITN           | LGDTQVVPQS  | HVAAAHETNM | LESNKHVD   |              |
| P3.L1  | MVDEVVEI VW           | ENGOISTQSQ  | SSRSRRAREI | GNGSKTTMVD | EIPMSVPSLM   |
|        | TGLSQDDDFV            | PWLNHH      |            |            |              |
| P6.L1  | MDQEYMEI VF           | ENGOILAKGQ  | RSNMDLYEAE | YNEDFMKSI  | I HGGGGAITNL |
|        | GDTQVVPQSH            | VAAAHETNML  | ESNKHVD    |            |              |
| P3.L2  | MVDEVVEI VW           | ENGOISTQSQ  | SSRSRNIPPP | QANSSRAREI | GNGSKTTMTG   |
|        | LSQDDDFVPW            | LNHH        |            |            |              |
| P6.L2  | MDQEYMEI VF           | ENGOILAKGQ  | RSNVSLHNQR | TKSIMDLYEA | EYNEDAITNL   |
|        | GDTQVVPQSH            | VAAAHETNML  | ESNKHVD    |            |              |
| P3.LP1 | MVDEVVEI VW           | ENGOISTQSQ  | SSRSRKPSSS | PPKLLPCMDP | QQQPSSDMTG   |
|        | LSQDDDFVPW            | LNHH        |            |            |              |
| P6.LP1 | MDQEYMEI VF           | ENGOILAKGQ  | RSNKPSSSPP | KLLPCMDPQQ | QPSSDAITNL   |
|        | GDTQVVPQSH            | VAAAHETNML  | ESNKHVD    |            |              |
| P3.LS  | MVDEVVEI VW           | ENGOISTQSQ  | SSRSRDSAGS | AGSAGMTGLS | QDDDFVPWLN   |
|        | HH                    |             |            |            |              |
| P6.LS  | MDQEYMEI VF           | ENGOILAKGQ  | RSNDSAGSAG | SAGAITNLGD | TQVVPQSHVA   |
|        | AAHETNMLES            | NKHVD       |            |            |              |
| P1.fus | MDDDLMEI LW           | QNGQVVVQNG  | RLHTKQNLFI | QEDEMSTWLH | YPLR         |
| P3.fus | MVDEVVEI VW           | ENGOISTQSQ  | SSRSRMTGLS | QDDDFVPWLN | HH           |
| P6.fus | MDQEYMEI VF           | ENGOILAKGQ  | RSNAITNLGD | TQVVPQSHVA | AAHETNMLES   |
|        | NKHVD                 |             |            |            |              |
| P1.A   | MDDDLMEI LW           | QNGQVVVQNG  | RLHTKKPSSS | PPKLLP     |              |
| P3.A   | MVDEVVEI VW           | ENGOISTQSQ  | SSRSRNIPPP | QANSSRAREI | GN           |
| P6.A   | MDQEYMEI VF           | ENGOILAKGQ  | RSNVSLHNQR | TKSIMDLYEA |              |
| P1.B   | MSMDPQQQPS            | SDQNLFIQED  | EMTSWLHYPL | R          |              |
| P3.B   | MGSKTTMVD             | I PMSVPSLMT | GLSQDDDFVP | WLNHH      |              |
| P6.B   | MEYNEDFMKS            | I IHGGGGAIT | NLGDTQVVPQ | SHVAAAHETN | MLESNKHVD    |
| P1.As  | MDDDLMEI LW           | QNGQVVVQNG  | RLHTK      |            |              |

P3.As MVDEVV**EL**VW EN**GO**ISTQSQ SSRSR  
 P6.As MDQEYM**EL**VF EN**GO**ILAKGQ RSN  
 P1.Bs MQNLFIQED EMTSWLHYPL R  
 P3.Bs MMT GLSQDDDFVP WLNHH  
 P6.Bs MAIT NLGDTQVVPQ SHVAAAHE TN MLESNKHVD  
 P1.AA MDDDL**ME**ILW QN**GO**VVVQ**NO** RLHTKKPSSS PPKLLPCMDP QQQPSSDDDD  
 L**ME**ILWQN**GO** VVVQNQLHT KMTSWLHYPL R  
 P3.AA MVDEVV**EL**VW EN**GO**ISTQSQ SSRSRNIPPP QANSSRAREI GNGSKTTMVD  
 EIPMSVPSLV DEVV**EL**VWEN **GO**ISTQSQSS RSRFVPWLNH H  
 P6.AA MDQEYM**EL**VF EN**GO**ILAKGQ RSNVSLHNQR TKSIMDLYE A EYNEDFMKSI  
 IHGGGDQEY **ME**ILVFEN**GO**I LAKGQRSNTN MLESNKHVD  
 P1.AAfus MDDDL**ME**ILW QN**GO**VVVQ**NO** RLHTKDDDL**ME**ILWQN**GO**VV VQNQLRHTKM  
 TSWLHYPLR  
 P3.AAfus MVDEVV**EL**VW EN**GO**ISTQSQ SSRSRVDEVV **EL**VWEN**GO**IS TQSQSSRSRF  
 VPWLNHH  
 P6.AAfus MDQEYM**EL**VF EN**GO**ILAKGQ RSN**DE**YM**EL** VFEN**GO**ILAK GQRSNTNMLE  
 SNKHVD  
 P1.BB MQNLFIQEDE KPSSSPKLL PCMDPQQQPS SDQNLFIQED EMTSWLHYPL  
 R  
 P3.BB MMTGLSQDDD NIPPPQANSS RAREIGNGSK TTMVDEIPMS VPSLMTGLSQ  
 DDDFVPWLNH H  
 P6.BB MAITNLGDTQ VSLHNQRTKS IMDLYEAEYN EDFMKSIIHG GGGAITNLGD  
 TQVVPQSHVA AAHETNMLES NKHVD  
 P1.BBfus MQNLFIQEDE QNLFIQEDEM TSWLHYPLR  
 P3.BBfus MMTGLSQDDD MTGLSQDDDF VPWLNHH  
 P6.BBfus MAITNLGDTQ AITNLGDTQV VPQSHVAAA H ETNMLESNKH VD  
 P1.BA MQNLFIQEDE KPSSSPKLL PCMDPQQQPS SDDDDL**ME**IL WQN**GO**VVVQ**NO**  
 QRLHTKMTSW LHYPLR  
 P3.BA MMTGLSQDDD NIPPPQANSS RAREIGNGSK TTMVDEIPMS VPSLVDEVV**E**  
 LVWEN**GO**IST QSQSSRSRFV PWNHH  
 P6.BA MAITNLGDTQ VVPQSHVAAA HEVSLHNQRT KSIMDLYEAE YNEDFMKSI I  
 HGGGDQEYM **EL**VFEN**GO**IL AKGQRSNTNM LESNKHVD  
 P1.BAfus MQNLFIQEDE DDDL**ME**ILWQ **NGO**VVVQ**NO**RLHTKMTSWLH YPLR  
 P3.BAfus MMTGLSQDDD VDEVV**EL**VWE **NGO**ISTQSQS SRSRFVPWLN HH  
 P6.BAfus MAITNLGDTQ VVPQSHVAAA HEDQEYM**EL**V FEN**GO**ILAKG QRSNTNMLES  
 NKHVD  
 P1.19 MDDDL**ME**ILW QN**GO**VVVQ**NO**  
 P3.19 MVDEVV**EL**VW EN**GO**ISTQSQ  
 P6.19 MDQEYM**EL**VF EN**GO**ILAKGQ  
 P1.14 MDDDL**ME**ILW QN**GO**V  
 P3.14 MVDEVV**EL**VW EN**GO**I

---

|       |                                              |
|-------|----------------------------------------------|
| P6.14 | MDQEYMEI <sup>VI</sup> VF EN <sup>GQ</sup> I |
| P1.8  | MEI <sup>LWQN</sup> GQ                       |
| P3.8  | MEI <sup>VWEN</sup> GQ                       |
| P6.8  | MEI <sup>VFEN</sup> GQ                       |

---

<sup>a</sup> Red color marks the N-terminal methionine; violet and gray color indicates strictly conserved and moderately conserved residues, respectively.

### Supplementary Reference

1. Khanna, R. et al. A Novel Molecular Recognition Motif Necessary for Targeting Photoactivated Phytochrome Signaling to Specific Basic Helix-Loop-Helix Transcription Factors. *Plant Cell* **16**, 3033–3044 (2004).
